# Supplementary material
Source: PubMed Central journal article supplement (PMC2877355)
Supplement: mmc1.pdf [file mmc1.pdf]

Biophysical Journal, Volume 98

**Supporting Material**

**Interplay between Intrinsic Noise and the Stochasticity of the Cell Cycle in Bacterial Colonies**

Oriol Canela-Xandri, Francesc Sagues, and Javier Buceta

# Supplementary Material: Interplay between Intrinsic Noise and the Stochasticity of the Cell Cycle in Bacterial Colonies, by Canela-Xandri et al.

## Parameters calibration

Note that if  $\Lambda_R = 0$  then protein production equals  $K$ . In our modeling, this regime corresponds to the operator at state  $O_{\emptyset\emptyset}$  when  $\langle c_{O_{\emptyset\emptyset}} \rangle = \Lambda_O$ . Thus, the following must be satisfied,

$$K = \langle \dot{c}_P \rangle = \langle k_P^+ c_{O_{\emptyset\emptyset}} \rangle = \langle k_P^+ \rangle \langle c_{O_{\emptyset\emptyset}} \rangle = \frac{k_0}{\ln 2} \Lambda_O.$$

By considering one gene copy,  $\Lambda_O \simeq 1.1\text{nM}$ , then  $k_0 \simeq 152.8 \text{ min}^{-1}$ . On the other hand, protein production is reduced by half when  $\Lambda_R = \beta = 55\text{nM}$ . In our modeling this corresponds when  $\langle c_{O_{\emptyset\emptyset}} \rangle = \Lambda_O/2 = 0.55\text{nM}$ . In order to use this condition we notice that at time scales of the order of the cell cycle binding-unbinding reactions reach equilibrium (adiabatic elimination). Thus, the following relations hold<sup>1</sup>,

$$\begin{aligned} \mathcal{K}_{R_2} &= \frac{\langle c_{R_2} \rangle}{\langle c_R \rangle^2}, \\ \mathcal{K}_{O_{\emptyset*}} &= \frac{\langle c_{O_{\emptyset*}} \rangle}{\langle c_{O_{\emptyset\emptyset}} \rangle \langle c_{R_2} \rangle}, \\ \mathcal{K}_{O_{*\emptyset}} &= \frac{\langle c_{O_{*\emptyset}} \rangle}{\langle c_{O_{\emptyset\emptyset}} \rangle \langle c_{R_2} \rangle}, \\ \mathcal{K}_{O_{**}} &= \frac{\langle c_{O_{**}} \rangle}{\langle c_{O_{\emptyset\emptyset}} \rangle \langle c_{R_2} \rangle^2}, \end{aligned}$$

where  $\mathcal{K}_X$  stands for the reaction equilibrium constant. We point out that only  $\mathcal{K}_{R_2} \simeq 10^{-1}\text{nM}^{-1}$  has been characterized experimentally. If we further assume that  $\mathcal{K}_{O_{\emptyset*}} = \mathcal{K}_{O_{*\emptyset}}$ , i.e. a repressor dimmer indistinctly binds to any of the operator sites, and  $\mathcal{K}_{O_{**}}/\mathcal{K}_{O_{*\emptyset}} = \alpha \gg \text{nM}^{-1}$ , i.e. the two binding sites

---

<sup>1</sup>Here we assume that when averaging over cell lineages the deterministic description is accurate and correlations can be neglected, e.g.  $\langle c_Z^m \rangle \simeq \langle c_Z \rangle^m$ .

interact cooperatively favoring the two sites to be occupied at low repressor concentration<sup>2</sup>, then the conservations laws for the total concentration of repressor and genetic material can be written as a function of the set of equilibrium constants and the concentrations  $\langle c_{O_{\emptyset\emptyset}} \rangle$  and  $\langle c_R \rangle$ :

$$\begin{aligned}\Lambda_R &= \langle c_R \rangle [1 + 2\mathcal{K}_{R_2} \langle c_R \rangle (1 + 2\mathcal{K}_{O_{\emptyset*}} \langle c_{O_{\emptyset\emptyset}} \rangle (1 + \alpha\mathcal{K}_{R_2} \langle c_R \rangle^2))], \\ \Lambda_O &= \langle c_{O_{\emptyset\emptyset}} \rangle [1 + \mathcal{K}_{R_2}\mathcal{K}_{O_{\emptyset*}} \langle c_R \rangle^2 (2 + \alpha\mathcal{K}_{R_2} \langle c_R \rangle^2)].\end{aligned}\quad (1)$$

By imposing in Eqs.(1) that if  $\Lambda_R = \beta = 55\text{nM}$  then  $\langle c_{O_{\emptyset\emptyset}} \rangle = \Lambda_O/2 = 0.55\text{nM}$ , and that  $\mathcal{K}_{O_{**}}/\mathcal{K}_{O_{\emptyset*}} = \alpha$ , we are able to obtain the value of the unknown equilibrium constants as a function of  $\alpha$ . In our *in silico* experiments we find that an optimal fit to the experimental gene regulatory function is obtained when  $\alpha \simeq 10^2\text{nM}^{-1}$  leading to:

$$\begin{aligned}\mathcal{K}_{O_{\emptyset*}} &= \mathcal{K}_{O_{\emptyset\emptyset}} \simeq 2.7 \cdot 10^{-5}\text{nM}^{-1}, \\ \mathcal{K}_{O_{**}} &\simeq 2.7 \cdot 10^{-3}\text{nM}^{-2}.\end{aligned}$$

We finally notice that  $\mathcal{K}_Z = k_Z^+/k_Z^-$  and that the unbinding rates,  $k_Z^-$ , are typically of order  $\sim 10^2\text{min}^{-1}$ . Thus, by supposing,  $k_{R_2}^- \simeq 10^2\text{min}^{-1}$  and  $k_{O_{\emptyset*}}^- = k_{O_{\emptyset\emptyset}}^- = k_{O_{**}}^- \simeq 6 \cdot 10^2\text{min}^{-1}$ , we finally obtain  $k_{R_2}^+ \simeq 10\text{min}^{-1}\text{nM}^{-1}$ ,  $k_{O_{**}}^+ \simeq 1.6\text{min}^{-1}\text{nM}^{-2}$ , and  $k_{O_{\emptyset*}}^+ = k_{O_{\emptyset\emptyset}}^+ \simeq 1.6 \cdot 10^{-2}\text{min}^{-1}\text{nM}^{-1}$ .

## Plasmid distribution as a source of noise in the gene regulatory function

Once the model parameters have been calibrated with the experimental results, we perform similar *in silico* protein dilution experiments but considering several copies (plasmids) of our gene of interest encoding for protein  $P$  in order to test the effect of plasmid distributions in the noise of the GRF. Thus, we suppose that the initial replicating cell harbors 25 copies ( $\Lambda_O \simeq 27.8\text{nM}$ ): a typical concentration of plasmids due to transformation. In this case we implement the simulations using both the modified Gillespie and the Langevin methods and two different plasmid distribution schemes: equally vs. binomially distributed. Our results show that the fitting parameters coincide for

---

<sup>2</sup>Note that the ratio between the probabilities of finding either two or one occupied sites of the operator read  $\mathcal{P}_{O_{**}}/\mathcal{P}_{O_{\emptyset\emptyset}} = \alpha c_{R_2}$ .

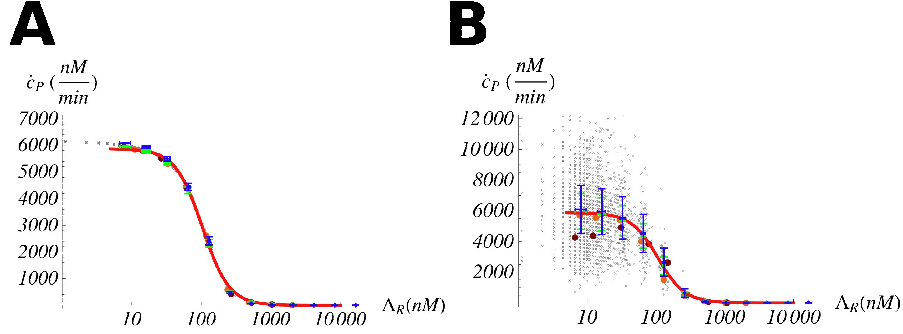

Figure 1: Gene regulatory function in *in silico* dilution experiments. **A:** Gene regulatory function (GRF) for the protein dilution process (25 gene copies equally distributed after division events): individual cells (gray crosses), average among cells (green/blue points with error bars indicate Gillespie/Langevin dynamics) and fit to Hill function (red solid line). The GRF for two cell lineages (orange and brown circles) have been highlighted. **B:** GRF for the protein dilution process when 25 gene copies following a binomial distribution after division is considered. Color and symbol codes as in **A**.

the partition schemes,

$$\text{Equally distributed : } \begin{cases} \hat{K} = (6106 \pm 1) \text{ nM/min} \\ \hat{\beta} = (102.8 \pm 0.1) \text{ nM} \\ \hat{n} = 2.034 \pm 0.004 \end{cases}$$

$$\text{Binomially distributed : } \begin{cases} \hat{K} = (6100 \pm 60) \text{ nM/min} \\ \hat{\beta} = (107 \pm 6) \text{ nM} \\ \hat{n} = 2.0 \pm 0.2 \end{cases},$$

however, the dispersion in the equally distributed case is largely reduced with respect to the binomial one (see Fig. 1).

## Numerical implementation of intrinsic and extrinsic noise averages

In order to calculate numerically the statistical averages with respect to intrinsic and extrinsic noise terms we implement *in silico* two copies,  $P_1$  and  $P_2$ , of our gene of interest in every cell. We average over  $N_{\text{cells}} = 5000$  cells

and refer all cellular clocks to a common laboratory time such that at the laboratory time  $t_j$ ,

$$\begin{aligned} \overline{\langle c_P(t_j) \rangle}^2 &= \left( \frac{1}{N_{\text{cells}}} \sum_{i=1}^{N_{\text{cells}}} c_{P_1}^i(t_j) \right)^2 = \left( \frac{1}{N_{\text{cells}}} \sum_{i=1}^{N_{\text{cells}}} c_{P_2}^i(t_j) \right)^2, \\ \overline{\langle c_P^2(t_j) \rangle} &= \frac{1}{N_{\text{cells}}} \sum_{i=1}^{N_{\text{cells}}} (c_{P_1}^i(t_j))^2 = \frac{1}{N_{\text{cells}}} \sum_{i=1}^{N_{\text{cells}}} (c_{P_2}^i(t_j))^2, \\ \overline{\langle c_P(t_j) \rangle}^2 &= \frac{1}{N_{\text{cells}}} \sum_{i=1}^{N_{\text{cells}}} c_{P_1}^i(t_j) c_{P_2}^i(t_j). \end{aligned}$$
